# Supplementary material for: Pilot-Scale Pelleting Tests on High-Moisture Pine, Switchgrass, and Their Blends: Impact on Pellet Physical Properties, Chemical Composition, and Heating Values
Source: Frontiers journal article supplement (doi:10.3389/fenrg.2021.788284), 2022-01-17
Supplement: Data_Sheet_1.docx [file Data_Sheet_1.docx]

Supplementary Material

| **Table S1.** Properties of blended pellets during at-line NIR analysis. | | | | | |
| --- | --- | --- | --- | --- | --- |
| **Sample ID*** | **Quantity of biomass pelleted (kg)** | **Number of samples collected at-line** | **Moisture content of biomass infeed (%)#** | **Pellet outfeed#** | |
| **Moisture content (%)** | **Temperature (°C)** |
| 2-in. (50.8 mm) SYP-50 | 227 | 11 | 17.9 ± 0.4 | 13.9 ± 0.4 | 52.4 ± 3.1 |
| 2-in. (50.8 mm) SYP-60 | 1000 | 22 | 18.0 ± 0.4 | 13.2 ± 0.6 | 54.5 ± 3.2 |
| 6-in. (152.4 mm) SYP-50 | 1000 | 26 | 17.1 ± 1.3 | 14.5 ± 2.8 | 52.2 ± 3.8 |
| 6-in. (152.4 mm) SYP-60 | 227 | 9 | 17.7 ± 0.2 | 12.6 ± 3.6 | 50.3 ± 7.0 |
| *Southern yellow pine (SYP) tops of varying stem diameter were blended with switchgrass at either 60:40 (SYP-60) or 50:50 (SYP-50) ratio; #Mean and standard deviations are provided for all the collected samples.  Note: 2-in. (50.8 mm), 6-in. (152.4 mm) SYP tops and switchgrass were ground in a hammer mill fitted with 1/4-in. (6.35 mm) screen. | | | | | |

**Table S2.** Average physical properties of southern yellow pine (SYP) tops, switchgrass (SG), and their blended pellets after low temperature drying.

| **Sample ID** | **L/D ratio** | **FMC (%)** | **PMC (%)** | **UD (kg/m3)** | **BD (kg/m3)** | **TD (kg/m3)** | **D (%)** |
| --- | --- | --- | --- | --- | --- | --- | --- |
| 6-in. (152.4 mm) SYP-100 | 7 | 18.4 | 5.76 (0.80) | 1129.9 (29.20) | 549.94 (3.79) | 605.16 (3.96) | 92.95 (0.28) |
| 9 | 19.5 | 7.06 (0.90) | 1140.9 (49.05) | 556.79 (1.44) | 613.22 (3.03) | 94.76 (0.29) |
| 7 | 24.7 | 9.87 (0.66) | 1109.5 (38.91) | 505.20 (2.12) | 554.71 (1.99) | 90.59 (0.35) |
| 9 | 24.5 | 8.69 (0.54) | 1088.7 (31.75) | 507.42 (2.17) | 562.91 (2.48) | 93.39 (0.44) |
| 5 | 20.2 | 8.47 (0.53) | 1030.2 (48.85) | 497.88 (6.22) | 547.44 (3.38) | 87.29 (0.32) |
| 5 | 26.1 | 9.12 (0.21) | 990.2 (34.52) | 456.81 (1.89) | 508.19 (3.48) | 86.99 (0.60) |
| 6-in. (152.4 mm) SYP-75 | 7 | 20.4 | 7.21 (0.31) | 1115.9 (45.23) | 555.22 (7.91) | 595.10 (7.41) | 95.2 (0.71) |
| 9 | 19.7 | 7.46 (0.34) | 1124.3 (40.17) | 574.62 (3.81) | 610.95 (2.96) | 93.35 (0.44) |
| 5 | 20.2 | 7.92 (0.19) | 1076.9 (71.93) | 550.50 (1.93) | 630.23 (1.91) | 88.63 (0.20) |
| 7 | 24.3 | 7.35 (0.13) | 1052.2 (32.30) | 525.19 (1.96) | 573.99 (2.94) | 91.73 (0.41) |
| 9 | 24.9 | 9.22 (0.17) | 1059.0 (73.81) | 524.86 (6.11) | 572.22 (3.34) | 92.77 (0.45) |
| 5 | 25.2 | 9.25 (0.76) | 970.48 (87.41) | 449.56 (5.95) | 498.36 (4.15) | 83.67 (0.94) |
| 6-in. (152.4 mm) SYP-50 | 7 | 21.1 | 6.78 (0.72) | 1082.1 (58.29) | 548.84 (6.52) | 593.59 (2.44) | 90.30 (0.34) |
| 9 | 18.8 | 7.15 (0.96) | 1078.0 (21.95) | 568.96 (1.03) | 625.09 (6.12) | 95.19 (0.19) |
| 5 | 18.3 | 6.41 (0.62) | 1071.0 (24.92) | 527.70 (5.22) | 575.92 (2.63) | 84.37 (0.91) |
| 7 | 24.7 | 7.38 (0.89) | 1088.1 (62.75) | 563.26 (4.72) | 595.67 (2.13) | 92.57 (0.28) |
| 9 | 24.5 | 8.31 (0.62) | 1088.4 (35.57) | 555.99 (1.98) | 608.72 (2.96) | 94.60 (0.15) |
| 5 | 23.0 | 8.78 (1.26) | 1060.8 (87.99) | 546.14 (1.68) | 612.99 (1.77) | 87.53 (0.19) |
| 6-in. (152.4 mm) SYP-25 | 7 | 19.4 | 6.18 (0.53) | 1188.6 (27.53) | 588.42 (2.09) | 638.38 (2.23) | 90.6 (0.71) |
| 9 | 20.2 | 7.93 (1.24) | 1092.9 (32.90) | 574.81 (1.01) | 624.04 (2.16) | 94.61 (0.17) |
| 5 | 18.8 | 8.01 (1.04) | 998.85 (95.35) | 553.82 (1.73) | 610.22 (3.73) | 79.6 (1.27) |
| 7 | 23.9 | 8.11 (2.57) | 1080.5 (25.49) | 577.98 (4.90) | 625.88 (3.25) | 92.71 (0.31) |
| 9 | 24.0 | 9.03 (2.96) | 1080.5 (30.90) | 573.06 (4.0) | 626.75 (4.60) | 94.72 (0.46) |
| 5 | 20.1 | 6.87 (2.16) | 1039.4 (23.88) | 503.02 (4.58) | 552.43 (3.40) | 81.04 (0.35) |
| 6-in. (152.4 mm) SYP-0 | 7 | 20.9 | 5.86 (0.17) | 1116.5 (22.46) | 590.87 (4.43) | 637.09 (1.72) | 93.75 (0.34) |
| 9 | 19.6 | 7.60 (0.15) | 1108.2 (39.59) | 583.18 (6.83) | 640.11 (3.08) | 95.05 (0.31) |
| 5 | 17.1 | 9.10 (0.13) | 1015.1 (29.94) | 549.31 (1.90) | 598.92 (2.04) | 87.35 (0.38) |
| 7 | 24.5 | 10.75 (0.40) | 1152.0 (38.36) | 577.10 (4.15) | 627.16 (4.36) | 94.04 (0.43) |
| 9 | 24.7 | 7.83 (0.14) | 1084.3 (46.10) | 578.54 (2.75) | 624.40 (2.48) | 95.09 (0.30) |
| 5 | 19.8 | 7.59 (0.27) | 1010.2 (57.45) | 515.21 (3.08) | 558.74 (1.19) | 88.43 (0.76) |
| **Note:** Mean (standard deviation) provided for *N* = 3. L/D ratio – Length to diameter ratio; FMC – Feed moisture content in wet basis; PMC – Pellet moisture content in wet basis; UD – Unit density; BD – Bulk density; TD – Tapped density; D – Durability; SYP – Southern yellow pine tops; SYP and switchgrass biomass were ground in a hammer mill fitted with a ¼-in. (6.35 mm) screen size and blended at a ratio of 100:0 (SYP-100), 75:25 (SYP-75), 50:50 (SYP-50), 25:75 (SYP-25) and 0:100 (SYP-0). | | | | | | | |

**Table S3.** Ultimate composition of southern yellow pine (SYP) tops, switchgrass (SG), and their blended pellets after preliminary high-moisture pelleting tests.

| **Sample ID** | **L/D** | **Carbon** | **Hydrogen** | **Nitrogen** |
| --- | --- | --- | --- | --- |
| 6-in. (152.4 mm) SYP-100 | 5 | 46.12 ± 0.38 | 6.60 ± 0.03 | 0.04 ± 0.00 |
| 5 | 45.72 ± 0.12 | 6.92 ± 0.04 | 0.03 ± 0.00 |
| 7 | 46.54 ± 0.21 | 6.56 ± 0.50 | 0.01 ± 0.00 |
| 7 | 46.82 ± 0.65 | 6.41 ± 0.21 | 0.07 ± 0.00 |
| 9 | 46.18 ± 0.18 | 6.49 ± 0.10 | 0.08 ± 0.00 |
| 9 | 46.35 ± 0.44 | 6.63 ± 0.05 | 0.03 ± 0.00 |
| 6-in. (152.4 mm) SYP-75 | 5 | 46.65 ± 0.08 | 6.42 ± 0.06 | 0.17 ± 0.00 |
| 5 | 46.58 ± 0.25 | 6.32 ± 0.12 | 0.16 ± 0.00 |
| 7 | 46.76 ± 0.13 | 6.49 ± 0.19 | 0.15 ± 0.00 |
| 7 | 46.87 ± 0.22 | 6.69 ± 0.13 | 0.10 ± 0.01 |
| 9 | 46.56 ± 0.35 | 6.53 ± 0.05 | 0.10 ± 0.00 |
| 9 | 47.10 ± 0.40 | 6.56 ± 0.08 | 0.10 ± 0.00 |
| 6-in. (152.4 mm) SYP-50 | 5 | 45.81 ± 0.48 | 6.51 ± 0.05 | 0.14 ± 0.00 |
| 5 | 45.86 ± 0.16 | 6.51 ± 0.12 | 0.14 ± 0.00 |
| 7 | 45.92 ± 0.29 | 6.25 ± 0.15 | 0.11 ± 0.00 |
| 7 | 45.64 ± 0.11 | 6.36 ± 0.13 | 0.14 ± 0.01 |
| 9 | 45.16 ± 0.33 | 6.14 ± 0.09 | 0.10 ± 0.00 |
| 9 | 45.15 ± 0.52 | 6.29 ± 0.08 | 0.13 ± 0.00 |
| 6-in. (152.4 mm) SYP-25 | 5 | 44.82 ± 0.14 | 6.15 ± 0.03 | 0.17 ± 0.00 |
| 5 | 45.15 ± 0.56 | 6.23 ± 0.02 | 0.23 ± 0.01 |
| 7 | 45.56 ± 0.23 | 6.29 ± 0.04 | 0.21 ± 0.00 |
| 7 | 45.41 ± 0.37 | 6.46 ± 0.12 | 0.20 ± 0.00 |
| 9 | 45.50 ± 0.15 | 6.66 ± 0.10 | 0.18 ± 0.02 |
| 9 | 46.07 ± 0.10 | 6.41 ± 0.09 | 0.17 ± 0.00 |
| 6-in. (152.4 mm) SYP-0 | 5 | 44.57 ± 0.46 | 5.74 ± 0.07 | 0.34 ± 0.01 |
| 5 | 46.06 ± 0.32 | 6.24 ± 0.05 | 0.30 ± 0.00 |
| 7 | 45.49 ± 0.25 | 5.68 ± 0.11 | 0.36 ± 0.00 |
| 7 | 45.20 ± 0.11 | 6.33 ± 0.09 | 0.26 ± 0.02 |
| 9 | 45.01 ± 0.22 | 6.33 ± 0.11 | 0.25 ± 0.01 |
| 9 | 45.93 ± 0.27 | 6.24 ± 0.17 | 0.25 ± 0.00 |
| **Note:** All physical properties were measured immediately after pellet production. Mean and standard deviations are provided for N = 3. SYP tops and SG were ground in a hammer mill fitted with a ¼-in. (6.35 mm) screen size and further blended at a ratio of 100:0 (SYP-100), 75:25 (SYP-75), 50:50 (SYP-50), 25:75 (SYP-25) and 0:100 (SYP-0). | | | | |

**Figure S1.** Correlation matrix of pellet durability and bulk density as a function of pelleting parameters. High-moisture pellets were produced on a pilot scale mill using 1/4-in. (6.35 mm) ground, 6-in. (152.4 mm) southern yellow pine (SYP) tops blended with ¼-in. (6.35 mm) ground switchgrass (SG) in ratios of 100:0, 75:25, 50:50, 25:75, and 0:100.

**Figure S2.** Correlation matrix of pellet ash content and HHV as a function of pelleting parameters. High-moisture pellets were produced on a pilot scale mill using 6-in. (152.4 mm) southern yellow pine (SYP) tops ground in a hammer mill fitted with a ¼-in. (6.35 mm) screen and blended with a ¼-in. (6.35 mm) ground switchgrass (SG) in ratios of 100:0, 75:25, 50:50, 25:75, and 0:100.

**Figure S3. (**A) Scatter plots of prediction results for higher heating value (HHV) of the blended pellets by a PLSR model trained with NIR principal component scores (in 950 to 1650 nm region) and pelleting process data. (B) Regression coefficients associated with the PLSR model for HHV. The biomass blends were composed of ¼ in. (6.35 mm) ground, 6-in. (152.4 mm) and 2-in. (50.8 mm) southern yellow pine (SYP) tops mixed with ¼-in. (6.35 mm) ground switchgrass (SG) at 60:40 or 50:50 ratio.

**Figure S4.** (A) Scatter plots of prediction results for moisture content of the blended pellets by a PLSR model trained with NIR principal component scores (in 950 to 1650 nm region) and pelleting process data. (B) Regression coefficients associated with the PLSR model for pellet moisture content. The biomass blends were composed of ¼ in. (6.35 mm) ground, 6-in. (152.4 mm) and 2-in. (50.8 mm) southern yellow pine (SYP) tops mixed with ¼-in. (6.35 mm) ground switchgrass (SG) at 60:40 or 50:50 ratio.

**Figure S5.** (A) Scatter plots of prediction results for carbon content of the blended pellets by a PLSR model trained with NIR principal component scores (in 950 to 1650 nm region) and pelleting process data. (B) Regression coefficients associated with the PLSR model for pellet carbon content. The biomass blends were composed of ¼-in. (6.35 mm) ground, 6-in. (152.4 mm) and 2-in. (50.8 mm) southern yellow pine tops mixed with 1/4 -in. (6.35 mm) switchgrass at 60:40 or 50:50 ratio.
